# Supplementary material for: 5-(Carbamoylmethylene)-oxazolidin-2-ones as a Promising Class of Heterocycles Inducing Apoptosis Triggered by Increased ROS Levels and Mitochondrial Dysfunction in Breast and Cervical Cancer
Source: PubMed Central journal article supplement (PMC7168333; doi:10.3390/biomedicines8020035), 2020-02-18
Supplement: biomedicines-08-00035-s001.pdf [file biomedicines-08-00035-s001.pdf]

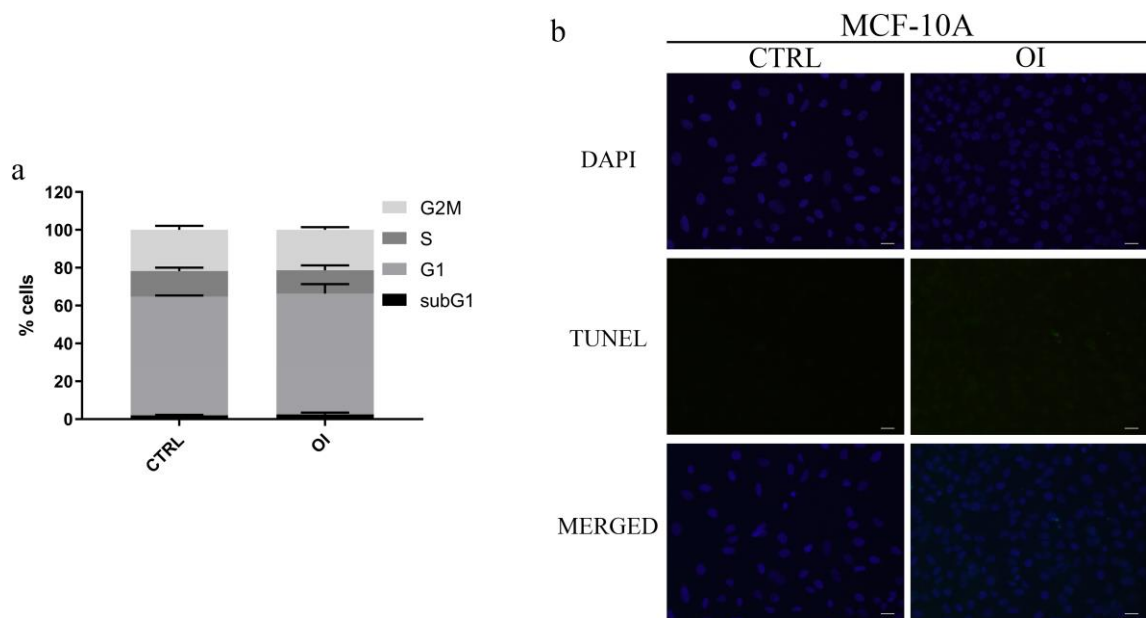

**Figure S1. OI does not determine cell cycle arrest and cell death in MCF-10A cells.** (a) Quantitative analysis of the percentage of cells in different phases of the cell cycle was indicated. Histograms represent means  $\pm$  SD of three different experiments. (b) TdT-mediated dUTP nick-end-labeling (TUNEL) assay in MCF-10A cells treated for 72 h with DMSO (CTRL) or 30  $\mu$ M OI. DAPI was used to visualize the cell nucleus. Scale Bars 25  $\mu$ m.
